# Supplementary material
Source: PubMed Central journal article supplement (PMC2652384)

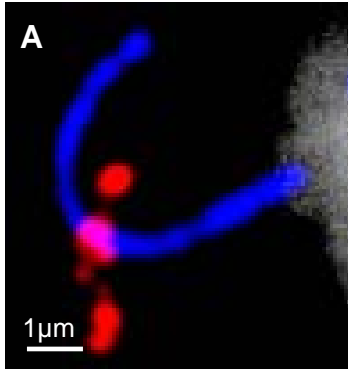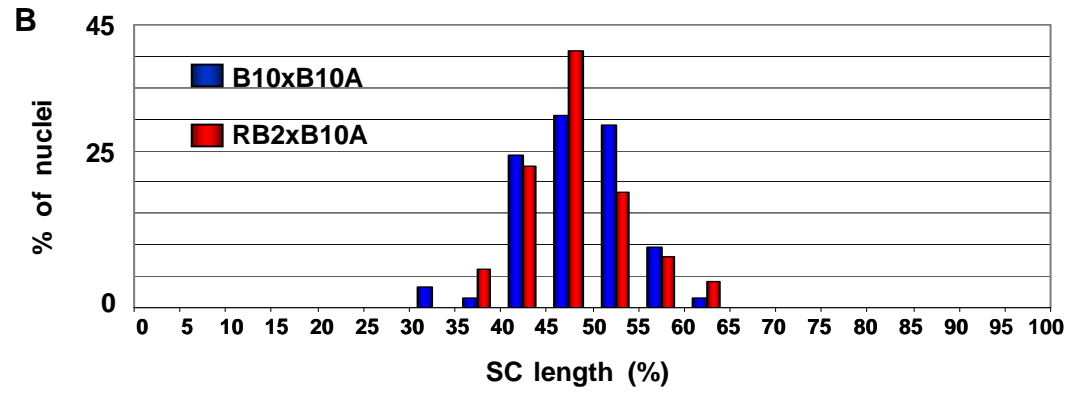

Supplement: pbio.1000035.sg002.pdf [file pbio.1000035.sg002.pdf]
